# Supplementary material for: ABCG2 regulates self-renewal and stem cell marker expression but not tumorigenicity or radiation resistance of glioma cells
Source: PubMed Central journal article supplement (PMC4960591; doi:10.1038/srep25956), 2016-07-26
Supplement: srep25956-s1.pdf [file srep25956-s1.pdf]

## Supplementary information

ABCG2 regulates self-renewal and stem cell marker expression but not tumorigenicity or radiation resistance of glioma cells

Boyoung Wee<sup>1,2,11</sup>, Alexander Pietras<sup>3,4,5,11</sup>, Tatsuya Ozawa<sup>3,4</sup>, Elena Bazzoli<sup>1,2</sup>, Ondrej Podlaha<sup>6,7</sup>, Christophe Antczak<sup>8,9</sup>, Bengt Westermark<sup>10</sup>, Sven Nelander<sup>10</sup>, Lene Uhrbom<sup>10</sup>, Karin Forsberg-Nilsson<sup>10</sup>, Hakim Djaballah<sup>8</sup>, Franziska Michor<sup>6,7</sup>, and Eric C. Holland<sup>3,4</sup>

<sup>1</sup>Cancer Biology and Genetics Program, <sup>2</sup>Brain Tumor Center, <sup>8</sup>HTS Core Facility, Memorial Sloan Kettering Cancer Center, New York, NY 10021, USA; <sup>3</sup>Human Biology Division, Solid Tumor and Translational Research, Fred Hutchinson Cancer Research Center, Seattle, WA 98109, USA; <sup>4</sup>Neurosurgery and Alvord Brain Tumor Center, University of Washington, Seattle, WA 98104, USA; <sup>5</sup>Translational Cancer Research, Department of Laboratory Medicine, Lund University, SE-22363 Lund, Sweden; <sup>6</sup>Department of Biostatistics and Computational Biology, Dana-Farber Cancer Institute, Boston, MA 02215, USA; <sup>7</sup>Department of Biostatistics, Harvard School of Public Health, Boston, MA 02215, USA; <sup>9</sup>Current address: Novartis Institutes for Biomedical Research, Center for Proteomic Chemistry, 250 Massachusetts Avenue, Cambridge, MA 02139, USA; <sup>10</sup>Department of Immunology, Genetics and Pathology, Science for Life Laboratory, Rudbeck Laboratory, Uppsala University, 751 85 Uppsala, Sweden

<sup>11</sup>Co-first authors

## Supplementary Information

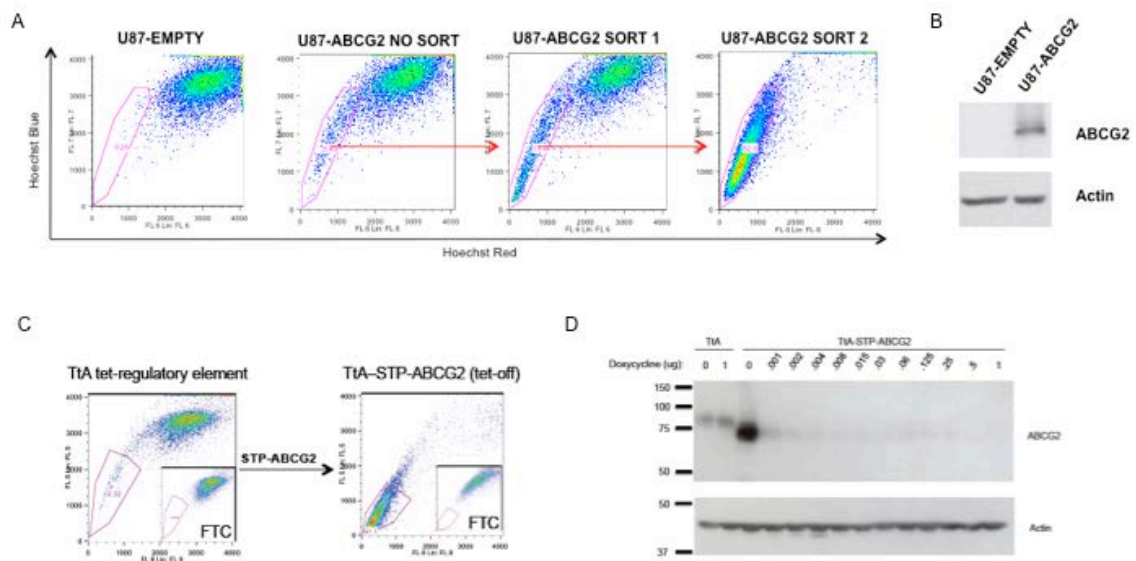

**Suppl. Fig. S1. Establishing U87MG cell line with high ABCG2 activity and primary cultures with tet-off-ABCG2.** (A-B) U87MG cell line with high ABCG2 activity was generated by retroviral transduction of pbabe-ABCG2 and double sorting for SP fraction. (C-D) Tet-off-ABCG2 was generated by stably expressing tet-regulatory element and tet-off-ABCG2. As low as 1 ng of doxycycline was enough to reduce significantly reduce ABCG2 protein levels.

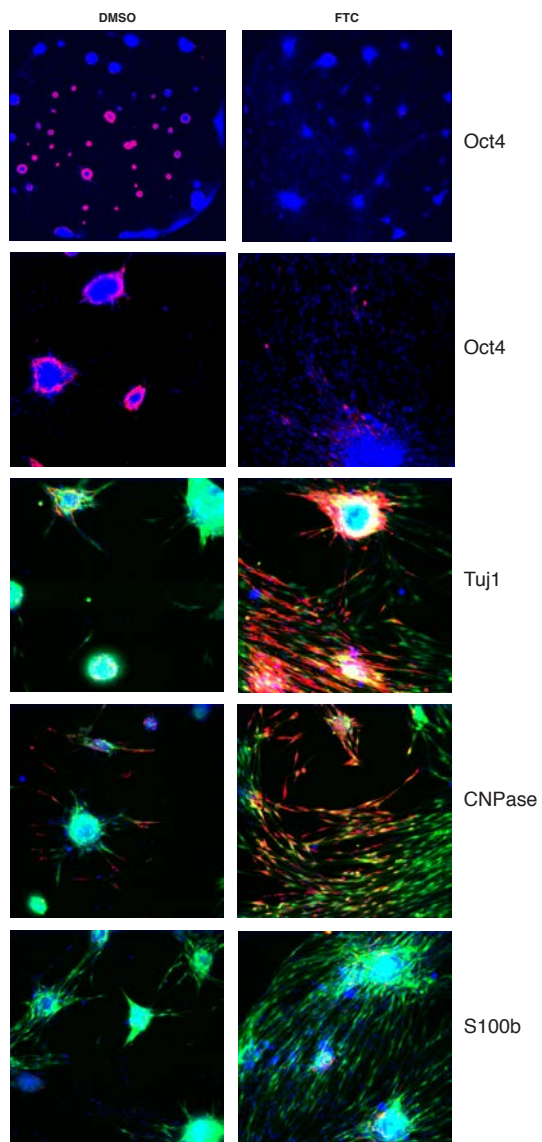

**Suppl. Fig. S2. Differentiation and stem cell marker expression following FTC treatment.** Additional high-resolution and higher-magnification images of cells presented and studied in Fig. 1g. Blue=DAPI, red=indicated protein, green=GFP (applies to Tuj1, CNPase, S100b).

**Suppl. Table S1. List of qRT-PCR primers used in the study**

| <b>Gene symbol</b>  | <b>Forward Primer 5'-&gt;3'</b>       | <b>Reverse Primer 5'-&gt;3'</b> |
|---------------------|---------------------------------------|---------------------------------|
| MEF/ELF4<br>(human) | 5'-TGGAAGGCAGTTTTTGGCTGA-3'           | 5'-GACTTCCGCGGTTGACATG-3'       |
| SOX2<br>(human)     | 5'-GCCTGGGCGCCGAGTGGA-3'              | 5'-GGGCGAGCCGTTTCATGTAGGTCTG-3' |
| POU5F1<br>(human)   | 5'-GCTCGAGAAGGATGTGGTCC -3'           | 5'-CGTTGTGCATAGTCGCTGCT -3'     |
| HES1<br>(human)     | 5'-TGAAATGACAGTGAAGCACCT-3'           | 5'-GTTTCATGCACTCGCTGAAGC-3'     |
| HEY1<br>(human)     | 5'-CGAAATCCCAAACCTCCGATA-3'           | 5'-TGGATCACCTGAAAATGCTG-3'      |
| HEY2<br>(human)     | 5'-TTGTCAGTATCAGCCACGTC-3'            | 5'-AGTTACCGAGCTGCCTTGAA-3'      |
| ID1<br>(human)      | Purchased from Qiagen<br>(QT00230650) |                                 |
| ID4<br>(human)      | 5'-GTGCGATATGAACGACTGCT-3'            | 5'-CAGGATCTCCACTTTGCTGA-3'      |
| 18S<br>(human)      | 5'-GTAACCCGTTGAACCCATT-3'             | 5'-CCATCCAATCGGTAGTAGCG-3'      |
| Mef/Elf4<br>(mouse) | 5'-TCCTGGATGAGAAGCAGATCTTCA-3'        | 5'-ATGGTGCTGCCTTTGCCATC-3'      |

|                          |                                       |                               |
|--------------------------|---------------------------------------|-------------------------------|
| <i>Sox2</i><br>(mouse)   | 5'-<br>TCCAAAACTAATCACAACAATCG-<br>3' | 5'-GAAGTGCAATTGGGATGAAAA-3'   |
| <i>Pou5f1</i><br>(mouse) | 5'-GTTGGAGAAGGTGGAACCAA-3'            | 5'-CTCCTTCTGCAGGGCTTTC-3'     |
| <i>Hes1</i><br>(mouse)   | 5'-TGCCAGCTGATATAATGGAGAA-<br>3'      | 5'-CCATGATAGGCTTTGATGACTTT-3' |
| <i>Hey1</i><br>(mouse)   | 5'-CATGAAGAGAGCTCACCCAGA-<br>3'       | 5'-CGCCGAACTCAAGTTTCC-3'      |
| <i>Id1</i><br>(mouse)    | Purchased from Qiagen<br>(QT01743756) |                               |
| <i>Klf4</i><br>(mouse)   | 5'-<br>GCGGGCTGATGGGCAAGTTTGT-3'      | 5'-TGCCGTCTGGGCTTCCTTTGCT-3'  |
| <i>cMyc</i><br>(mouse)   | 5'- GACAGCAGCTCGCCCAAAT -3'           | 5'- AGCAGCGAGTCCGAGGAA -3'    |
| <i>Gapdh</i><br>(mouse)  | 5'-TGGCAAAGTGGAGATTGTTGCC-<br>3'      | 5'-AAGATGGTGATGGGCTTCCCG-3'   |
